# Supplementary material for: Use of <em>Pseudomonas protegens </em>to Control Root Rot Disease Caused by <em>Boeremia exigua</em> var. <em>exigua </em>in Industrial Chicory (<em>Cichorium intybus</em> var. <em>sativum</em> Bisch.)
Source: Preprints.org preprint supplement (doi:10.20944/preprints202311.0527.v1), 2023-11-08
Supplement: Supplementary file 3 [file supplementary]

## Sheet: SELVANEGRA2015
Tratamiento	Trat	Rep	Pl/ha	t/ha Raíz limpia	t/ha raíz Limpia-Sana	t/ha Total Follaje	t/ha WSD 3,2	t/ha WSD 4,2 + 5	WSD t/ha			Trat	Rep	Nro Raices 15 ml ó 10ml	G1	G2	G3.1	G3.2	G4.1	G4.2	G5	Sanas	WSD	Incidencia total	TAnBlis Inc.total	Incidencia2+3.2+3.2	TAnBlis Inc.2+3.1+3.2	Incidencia 4.1+4.2	TAnBlis Inc.4.1+4.2	Incidencia 3.2+4.2+5	TAnBlis Inc3.2+4.2+5	SEVERIDAD TOTAL	TANBLIS SEV TOTAL	Severidad 2+3.1+3.2	TanBlisSEV2+31+3.2	SEV 4.1+4.2	TanBlisSEV4.1+4.2	SEV 3.2+4.2+5	TanBlisSEV3.2+4.2+5
Testigo sano	1	1	180741	109.481	99.3777	18.5778	4	6.1037	10.1037			1	1	122		45	17	5	5	7	0	43	79	64.7541	53.5812	54.918	47.8224	9.83607	18.2778	9.83607	18.2778	26.6979	31.1112	25.6831	30.4499	7.78689	16.2035	5.19126	13.1701
Testigo sano	1	2	176296	102.667	87.2295	16.0592	6.45925	8.97777	15.437			1	2	119		33	17	5	3	10	1	50	69	57.9832	49.5937	46.2185	42.8313	10.9244	19.3004	13.4454	21.511	26.2905	30.8467	22.9692	28.6372	9.66387	18.1115	7.84314	16.2635
Testigo sano	1	3	208889	118.904	109.274	14.8741	3.37777	6.25185	9.62962			1	3	141		58	24	3	1	6	0	49	92	65.2482	53.878	60.2837	50.9345	4.96454	12.8743	6.38298	14.6341	24.4174	29.6131	27.1868	31.4268	4.60993	12.3984	3.5461	10.8542
Testigo sano	1	4	189629	111.496	95.2888	13.7481	8.59258	7.61481	16.2074			1	PRO	127.5	0	46.5	20	5	2.5	7	0.5	46	81.5	62.6618	52.351	53.8067	47.196	8.57499	16.8175	9.88814	18.141	25.8019	30.5236	25.2797	30.1713	7.35356	15.5711	5.52683	13.4293
Testigo sano	1	PRO	188642	110.351	98.6271	16.5037	4.61234	7.1111	11.7234	16.5037														1.35312	0.797495	2.36605	1.36258	1.05791	1.15099	1.17716	1.14682	0.405402	0.266532	0.712509	0.471842	0.85156	0.969534	0.722695	0.904653
Testigo sano		EE	5891.53	2.71778	3.68045	0.630476	0.543149	0.539425	1.07493			2	1	90		39	13	3	1	5	0	29	61	67.7778	55.4137	61.1111	51.4198	6.66667	14.9632	8.88889	17.3461	26.0317	30.678	27.4074	31.5687	6.11111	14.3123	4.81481	12.6754
Testigo phoma	2	1	200000	112.8	103.022	15.8222	3.86666	5.91111	9.77777			2	2	78		24	13	3	0	17	2	19	59	75.641	60.4259	51.2821	45.7346	21.7949	27.83	28.2051	32.0788	39.3773	38.8669	25.2137	30.1412	21.7949	27.83	18.3761	25.3834
Testigo phoma	2	2	173333	112.933	85.911	10.2222	3.73333	23.2889	27.0222			2	3	63		34	16	4	3	6	0	0	63	100	90	85.7143	67.7923	14.2857	22.2077	15.873	23.4788	41.4966	40.1041	41.2698	39.9722	11.9048	20.1838	8.46561	16.9153
Testigo phoma	2	3	140000	110	91.2888	14.5778	6.79999	11.9111	18.7111			2	PRO	82	0	30.5	15.25	2.75	1.5	8.25	1.5	22.25	59.75	81.1396	68.6132	66.0358	54.9823	14.2491	21.667	17.6557	24.3012	35.6352	36.5497	31.297	33.894	13.2702	20.7754	10.5522	18.3247
Testigo phoma	2	4	215555	118.222	104.089	17.2	3.15555	10.9778	14.1333															5.60004	6.23009	5.91217	3.81742	2.52139	2.15014	3.26024	2.46691	2.79469	1.7075	2.90204	1.77068	2.64351	2.25942	2.33909	2.15673
Testigo phoma	2	PRO	171111	111.911	93.4073	13.5407	4.8	13.7037	18.5037			3	1	120			24	23	9	2	7	55	65	54.1667	47.3901	39.1667	38.7433	9.16667	17.6238	26.6667	31.0909	32.1429	34.5376	32.5	34.7563	5.41667	13.4583	13.3333	21.4167
Testigo phoma			10020.5	0.552137	2.91669	0.980168	0.577777	2.94216	2.87469			3	2	129		44	17	2	2	5	0	59	70	54.2636	47.4458	48.8372	44.3337	5.42636	13.4705	5.42636	13.4705	20.7087	27.0694	21.7054	27.7679	4.65116	12.4546	3.10078	10.1421
ChB7 semilla +Phoma	3	1	193333	110.089	98.5332	14.9778	8.3111	3.24444	11.5555			3	3	109			45	16	5	0	2	41	68	62.3853	52.1709	55.9633	48.4249	4.58716	12.3672	16.5138	23.9771	31.1927	33.9524	42.2018	40.5137	2.29358	8.71071	6.72783	15.0333
ChB7 semilla +Phoma	3	2	177778	114.444	103.778	12.1778	5.46666	5.19999	10.6667			3	PRO	120.25	0	20.5	25	12	5	5	2.5	50.25	70	56.9385	49.0023	47.9891	43.834	6.39339	14.4872	16.2023	22.8462	28.0148	31.8531	32.1358	34.346	4.12047	11.5412	7.72065	15.5307
ChB7 semilla +Phoma	3	3	184444	110.178	99.2443	14.8	7.19999	3.73333	10.9333															1.57244	0.914755	2.81013	1.62003	0.812701	0.923937	3.54119	2.95482	2.115	1.38439	3.41769	2.1276	0.542591	0.834037	1.72934	1.88458
ChB7 semilla +Phoma	3	4	188889	116.178	96.3555	14.4889	4.44444	15.3778	19.8222			4	1	87		35	14	5	1	3	0	29	58	66.6667	54.7356	62.069	51.984	4.5977	12.3816	9.1954	17.6523	25.4516	30.2979	29.8851	33.139	4.02299	11.5705	4.21456	11.8467
ChB7 semilla +Phoma	3	PRO	185185	111.57	100.518	13.9852	6.99259	4.05926	11.0518			4	2	80		28	19	3	0	3	1	26	54	67.5	55.2437	62.5	52.2388	3.75	11.1658	8.75	17.2058	26.7857	31.168	31.25	33.9878	3.75	11.1658	5	12.921
ChB7 semilla +Phoma			2601.39	0.829805	0.948302	0.522594	0.47784	0.339234	0.152047			4	3	83		32	15	5	0	2	1	28	55	66.2651	54.4919	62.6506	52.3279	2.40964	8.93014	9.63855	18.087	25.4733	30.3122	30.9237	33.7859	2.40964	8.93014	4.81928	12.6813
Ca10A+Phoma	4	1	213333	118.667	111.644	15.0222	5.91111	1.11111	7.02222			4	pro	83.75	0	29	18.25	3.75	0.5	3.75	0.75	27.75	56	66.8106	54.8237	62.4065	52.1835	3.58578	10.8259	9.19465	17.6483	25.9035	30.5927	30.6863	33.6376	3.39421	10.5555	4.67795	12.483
Ca10A+Phoma	4	2	177778	109.2	101.822	11.9111	3.42222	3.95555	7.37777															0.209974	0.127847	0.100625	0.0594957	0.367745	0.583562	0.148093	0.146873	0.25469	0.166098	0.237593	0.147807	0.28784	0.474022	0.137117	0.187975
Ca10A+Phoma	4	3	160000	97.1555	95	11.9555	5.42222	3.11111	8.53332			5	1	130		39	21	5	0	4	0	61	69	53.0769	46.7641	50	45	3.07692	10.1026	6.92308	15.2551	20.3297	26.8004	24.6154	29.7449	3.07692	10.1026	3.33333	10.5197
Ca10A+Phoma	4	4	151111	105.822	69.0222	13.2889	12.7111	24.0889	36.8			5	2	123		53	11	7	0	3	0	49	74	60.1626	50.8636	57.7236	49.4431	2.43902	8.98488	8.13008	16.5668	21.4866	27.6156	26.0163	30.6679	2.43902	8.98488	3.52304	10.8184
Ca10A+Phoma	4	PRO	183704	108.341	102.822	12.963	4.91851	2.72592	7.64444			5	3	122		45	26	3	3	8	0	37	85	69.6721	56.5844	60.6557	51.1525	9.01639	17.474	9.01639	17.474	28.4543	32.2372	28.9617	32.5586	7.78689	16.2035	5.19126	13.1701
Ca10A+Phoma			9051.99	3.59375	2.78904	0.594502	0.439561	0.486939	0.263354			5	PRO	127	0	42	17.5	6.5	1.75	7.5	1.5	50.25	76.75	60.9706	51.404	56.1264	48.5318	4.84411	12.1872	8.02318	16.432	23.4235	28.8844	26.5311	30.9905	4.43428	11.7637	4.01588	11.5028
ChB7+Ca10A+Phoma	5	1	180000	112.489	97.5555	16.4889	10.5778	4.35555	14.9333															2.77568	1.64415	1.83483	1.05861	1.20912	1.53751	0.350248	0.371857	1.46501	0.977363	0.739485	0.478099	0.973637	1.29514	0.340773	0.483894
ChB7+Ca10A+Phoma	5	2	184444	112.889	96.8443	13.5111	8.3111	7.73333	16.0444			6	1	96		36	15	1	0	1	0	43	53	55.2083	47.9896	54.1667	47.3901	1.04167	5.85793	2.08333	8.29892	18.8988	25.768	23.9583	29.3059	1.04167	5.85793	1.04167	5.85793
ChB7+Ca10A+Phoma	5	3	197778	115.244	93.4666	16.7555	7.24444	14.5333	21.7778			6	2	80		28	20	2	0	3	0	27	53	66.25	54.4828	62.5	52.2388	3.75	11.1658	6.25	14.4775	25.3571	30.2357	30.8333	33.7298	3.75	11.1658	3.33333	10.5197
ChB7+Ca10A+Phoma	5	4	193333	124.755	97.6888	16.8889	8.44444	18.6222	27.0666			6	3	72		17	25	3	2	1	0	24	48	66.6667	54.7356	62.5	52.2388	4.16667	11.7782	5.55556	13.633	27.1825	31.4241	35.1852	36.3824	2.77778	9.59407	2.31481	8.75126
ChB7+Ca10A+Phoma	5	PRO	187407	113.541	95.9555	15.5852	8.7111	8.87407	17.5852			6	pro	79	0	22.5	19.75	3	0.75	4.25	0.5	28.25	50.75	62.7083	52.4027	59.7222	50.6225	2.98611	9.60066	4.62963	12.1365	23.8128	29.1426	29.9923	33.1394	2.52315	8.87261	2.22994	8.37631
ChB7+Ca10A+Phoma			3083.95	0.496314	0.728189	0.60038	0.567428	1.72796	1.22438															2.16618	1.27464	1.60375	0.933125	0.565592	1.08524	0.744109	1.11671	1.45081	0.994105	1.88683	1.19166	0.457335	0.908835	0.38273	0.784471
ChB7+Ca10A sin Pho	6	1	201481	124.267	120.296	14.2222	3.49629	0.474074	3.97037			7	1	136		44	22	4	2	1	0	63	73	53.6765	47.1084	51.4706	45.8427	2.20588	8.54129	3.67647	11.0544	19.5378	26.2326	24.5098	29.6746	1.47059	6.96528	1.47059	6.96528
ChB7+Ca10A sin Pho	6	2	182222	124.978	112.859	15.7926	3.73333	8.38518	12.1185			7	2	123		37	33	4	0	7	0	42	81	65.8537	54.243	60.1626	50.8636	5.69106	13.8015	8.94309	17.4006	26.8293	31.1962	31.1653	33.9355	5.69106	13.8015	4.87805	12.7597
ChB7+Ca10A sin Pho	6	3	192592	115.615	102.578	13.2444	5.59999	7.43703	13.037			7	3	130		33	24	6	1	5	3	58	72	55.3846	48.0912	48.4615	44.1184	4.61538	12.4058	10.7692	19.1574	23.956	29.3044	25.3846	30.2538	4.23077	11.8698	6.41026	14.6661
ChB7+Ca10A sin Pho	6	4	165926	117.63	94.9925	12.3852	11.7333	10.9037	22.637			7	PRO	125.25	0	35.5	25.25	6	2	5.75	1.75	49	76.25	58.3049	49.8142	53.3649	46.9416	4.17077	11.5829	7.79626	15.8708	23.441	28.911	27.0199	31.288	3.79747	10.8789	4.25296	11.4637
ChB7+Ca10A sin Pho	6	PRO	192099	121.62	111.911	14.4197	4.27654	5.43209	9.70863															2.19765	1.28894	2.0254	1.1681	0.594873	0.908322	1.22761	1.42087	1.2243	0.83502	1.20552	0.770343	0.714446	1.17474	0.842821	1.33688
			3213.04	1.73752	2.96574	0.428502	0.384086	1.43995	1.66355			8	1	81		29	17	6	0	2	0	27	54	66.6667	54.7356	64.1975	53.2481	2.46914	9.04063	9.87654	18.3167	25.5732	30.3778	33.3333	35.2644	2.46914	9.04063	4.11523	11.7043
												8	2	83		32	17	4	0	5	0	25	58	69.8795	56.7138	63.8554	53.0439	6.0241	14.2079	10.8434	19.2259	27.7108	31.7633	31.3253	34.0344	6.0241	14.2079	5.62249	13.7165
analisis de infostat con las tres primeras repetciones												8	3	89		20	21	3	5	8	0	32	57	64.0449	53.1569	49.4382	44.6781	14.6067	22.4693	12.3596	20.5829	30.1766	33.3212	26.5918	31.0424	11.7978	20.0889	7.1161	15.4716
												8	pro	85	0	25.25	17.5	4.5	1.25	6.75	0	29.75	55.25	66.8637	54.8688	59.1637	50.3233	7.69999	15.2392	11.0265	19.3751	27.8202	31.8208	30.4168	33.447	6.76366	14.4458	5.61794	13.6308
																								0.974091	0.594059	2.80809	1.62999	2.07998	2.25782	0.417197	0.380138	0.767878	0.490848	1.1538	0.723805	1.56936	1.84267	0.500148	0.628372
												9	1	82		21	19	4	0	1	0	37	45	54.878	47.7994	53.6585	47.0981	1.21951	6.34019	6.09756	14.2961	21.0801	27.3311	28.8618	32.4954	1.21951	6.34019	2.43902	8.98488
												9	2	94		30	14	2	2	2	0	44	50	53.1915	46.8298	48.9362	44.3904	4.25532	11.9047	4.25532	11.9047	20.0608	26.6086	22.695	28.4501	3.19149	10.291	2.12766	8.38737
												9	3	79		34	17	5	4	6	0	13	66	83.5443	66.0677	70.8861	57.3454	12.6582	20.8415	13.9241	21.91	35.2622	36.4286	35.0211	36.2839	10.1266	18.5555	7.173	15.5349
												9		87.5	0	33.25	15.75	3.75	1.5	3.75	0	29.5	58	63.8713	53.5656	57.8269	49.6113	6.04435	13.0288	8.09231	16.0369	25.4677	30.1227	28.8593	32.4098	4.84586	11.7289	3.91323	10.969
																								5.68606	3.61266	3.85114	2.2778	1.97517	2.43857	1.71125	1.74163	2.83253	1.82431	2.05434	1.30586	1.55944	2.07777	0.942444	1.32179

## Sheet: LA2015
Tratamiento	Trat	Rep	Pl/ha	t/ha Raíz limpia	t/ha raíz Limpia-Sana	t/ha Total Follaje	t/ha WSD 3,2	t/ha WSD 4,2 + 5	WSD t/ha
Testigo sano	1	1	177778	62.7259	54.0444	6.48888	3.05185	5.62962	5.7
Testigo sano	1	2	189629	66.2814	62.4592	10.4	0	3.82222	3.82222
Testigo sano	1	3	188148	53.4222	53.4222	11.8815	0	0	0
Testigo sano	1	4	208889	69.0962	68.4147	12.3259	0	0.681481	0.681481
Testigo sano	1	PRO	191111	62.8814	59.5851	10.2741	0.762962	2.53333	2.55092
Testigo sano			3242.94	1.70591	1.79643	0.663597	0.381481	0.662938	0.669809
Testigo phoma	2	1	177778	63.511	55.2444	7.86666	1.37778	6.88888	8.26666
Testigo phoma	2	2	197778	60.6	53.5	13.3778	3.64444	0.844444	4.48888
Testigo phoma	2	3	206666	62.9777	60.9777	9.86666	0	2	2
Testigo phoma	2	4	186666	51.6444	44.3111	14.6222	3.42222	3.91111	7.33333
Testigo phoma	2	PRO	192222	59.6833	53.5083	11.4333	2.11111	3.41111	5.52222
Testigo phoma	2		3159.02	1.37666	1.72841	0.77896	0.434566	0.660238	0.711306
ChB7 semilla +Phoma	3	1	184444	68.5333	56.5777	8.22221	6.57777	15.3778	13
ChB7 semilla +Phoma	3	2	180000	78.2666	66.8888	12.7111	7.64444	3.73333	11.3778
ChB7 semilla +Phoma	3	3	195555	63.911	58.6666	13.5111	2.26666	2.97777	5.24444
ChB7 semilla +Phoma	3	4	193333	72.1777	64.0888	13.4667	5.11111	2.97777	8.08888
ChB7 semilla +Phoma	3	pro	188333	70.7222	61.5555	11.9778	5.39999	6.26666	9.42777
ChB7 semilla +Phoma	3		1835.57	1.51534	1.19011	0.632618	0.5832	1.52113	0.864294
Ca10A+Phoma	4	1	166666	58.6666	56.3999	8.39999	0.666666	1.6	2.26666
Ca10A+Phoma	4	2	197778	57.3333	56.6222	10.8444	0	0.71111	0.71111
Ca10A+Phoma	4	3	202222	71.7333	69.0666	14.3111	0	2.66666	2.66666
Ca10A+Phoma	4	4	195555	70.8888	68.4444	12.5333	0	2.44444	2.44444
Ca10A+Phoma	4	pro	190555	64.6555	62.6333	11.5222	0.166666	1.85555	2.02222
Ca10A+Phoma	4		4041.32	1.92803	1.76862	0.629283	0.0833332	0.222661	0.222315
ChB7+Ca10A+Phoma	5	1	193333	64.3999	62.311	7.28888	0	2.08889	2.08889
ChB7+Ca10A+Phoma	5	2	208889	70.8444	67.4666	13.7333	2.35555	1.02222	3.37777
ChB7+Ca10A+Phoma	5	3	171111	61.8666	50.1333	10.5333	4.8	6.93333	5.85
ChB7+Ca10A+Phoma	5	4	197778	62.1777	62.1777	9.1111	0	0	0
ChB7+Ca10A+Phoma	5	pro	192778	64.8222	60.5222	10.1667	1.78889	2.51111	2.82917
ChB7+Ca10A+Phoma	5		3964.21	1.04257	1.83766	0.680859	0.573515	0.767256	0.612008
ChB7+Ca10A sin Pho	6	1	194074	68.8296	64.2962	10.1333	1.65926	2.87407	4.53333
ChB7+Ca10A sin Pho	6	2	188148	69.5703	66.0147	14.5778	0	3.55555	3.55555
ChB7+Ca10A sin Pho	6	3	195555	63.2888	61.037	12.5333	0	2.25185	2.25185
ChB7+Ca10A sin Pho	6	4	186666	80.5481	73.5555	13.6296	0.977777	6.01481	6.99259
ChB7+Ca10A sin Pho	6	PRO	191111	70.5592	66.2259	12.7185	0.659259	3.67407	4.33333
			1090.34	1.80627	1.32615	0.47881	0.202623	0.412205	0.501023

## Sheet: SN2017
Tratamiento	Tratamiento	Repetición	Pl/ha	t/ha raíz Limpia-Sana	t/ha Total Follaje	t/ha WSD 3,2	t/ha WSD 4,2 + 5	WSD t/ha	Incidencia %)	Incidencia trans	Incidencia 2+3,1+4,1 (%)	Incidencia 2+3,1+4,1 trans	Incidencia 3,2	Incidencia 3,2 trans	Incidencia 4,2+5 (%)	Incidencia 4,2+5 trans	Severidad %)	Severidad trans	Severidad 2+3,1+4,1 (%)	Severidad 2+3,1+4,1 trans	Severidad 3,2	Severidad 3,2 trans	Severidad 4,2+5 (%)	Severidad 4,2+5 trans
Testigo sano	1	1	166666	78.8147	26.9074	0.37037	0.592592	0.962962	35	36.2712	33.8889	35.6013	0.555556	4.27454	0.555556	4.27454	11.2698	19.6155	13.1481	21.2602	0.555556	4.27454	0.277778	3.02115
Testigo sano	1	2	177778	79.6851	27.3148	0.648147	0.462962	1.11111	25.5208	30.3434	23.9583	29.3059	0.520833	4.13856	1.04167	5.85793	8.55655	17.0086	8.85417	17.3111	0.520833	4.13856	1.04167	5.85793
Testigo sano	1	3	152778	71.6481	22.4259	1.22222	2.72222	3.94444	30.9091	33.7768	25.4545	30.2998	1.81818	7.74937	3.63636	10.9932	12.5541	20.7516	10.7071	19.0999	1.81818	7.74937	2.42424	8.95738
Testigo sano	1	4	159259	73.8518	26.0926	0.944443	1.64815	2.59259	34.3023	35.8512	30.2326	33.3561	0.581395	4.37301	3.48837	10.7645	13.3721	21.4494	12.4031	20.6207	0.581395	4.37301	2.61628	9.30844
Testigo sano		PROMEDIO	164120	75.9999	25.6852	0.796296	1.35648	2.15278	31.4331	34.0606	28.3836	32.1408	0.868992	5.13387	2.18049	7.97253	11.4381	19.7063	11.2781	19.573	0.868992	5.13387	1.58999	6.78623
Testigo sano		E.E	2682.09	0.968857	0.557865	0.0920508	0.263479	0.35072	1.0819	0.676865	1.1355	0.719924	0.15832	0.436578	0.402271	0.854717	0.526733	0.487696	0.477935	0.439802	0.15832	0.436578	0.28032	0.737578
Testigo phoma	2	1	187037	79.574	30	0.981481	0.537037	1.51852	25.2475	30.1635	23.7624	29.1742	0.990099	5.71059	0.49505	4.03465	7.99151	16.421	8.41584	16.864	0.990099	5.71059	0.247525	2.85175
Testigo phoma	2	2	194444	81.7962	28.074	0.333333	0.314815	0.648147	25.2381	30.1573	24.2857	29.5251	0.47619	3.95693	0.47619	3.95693	8.09524	16.5302	9.04762	17.5052	0.47619	3.95693	0.238095	2.79686
Testigo phoma	2	3	166666	79.1481	26.5185	0.888888	0.74074	1.62963	32.2222	34.5863	30.5556	33.5573	0.555556	4.27454	1.11111	6.05075	10.7143	19.1066	11.4815	19.8064	0.555556	4.27454	0.833333	5.23766
Testigo phoma	2	4	162963	70.9814	25.8889	0.734567	0.530864	1.26543	26.7045	31.1155	22.7273	28.4721	1.13636	6.11938	2.84091	9.70352	10.3896	18.8038	9.09091	17.5484	1.13636	6.11938	1.70455	7.50185
Testigo phoma		PROMEDIO	177778	77.8749	27.6203	0.734567	0.530864	1.26543	27.3531	31.5056	25.3327	30.1822	0.789552	5.01536	1.23082	5.93646	9.29766	17.7154	9.50896	17.931	0.789552	5.01536	0.755875	4.59703
Testigo phoma		E.E	3836.36	1.18502	0.458271	0.0715556	0.0434845	0.109709	0.829604	0.525632	0.885397	0.573067	0.0808093	0.265019	0.278296	0.672979	0.363748	0.359406	0.337681	0.322212	0.0808093	0.265019	0.172753	0.561527
ChB7 semilla +Phoma	3	1	168518	81.6851	28.9259	0	0.296296	0.296296	30.7692	33.6901	30.2198	33.3482	0	0	0.549451	4.25094	9.49765	17.9497	10.989	19.3596	0	0	0.274725	3.00449
ChB7 semilla +Phoma	3	2	168518	78.074	25.8703	0.228395	1.74074	1.96913	25.8242	30.5423	23.0769	28.7105	2.1978	8.52552	0.549451	4.25094	8.79121	17.2475	8.60806	17.0613	2.1978	8.52552	0.274725	3.00449
ChB7 semilla +Phoma	3	3	198148	75.1666	27.5	0.685184	3.03703	3.72222	29.9065	33.1525	26.6355	31.0707	0.46729	3.91972	2.80374	9.63922	11.749	20.0456	11.838	20.1247	0.46729	3.91972	1.40187	6.7998
ChB7 semilla +Phoma	3	4	152778	78.3086	27.4321	0	1.88889	1.88889	32.1212	34.5243	29.697	33.0212	0	0	2.42424	8.95738	11.7749	20.0686	12.3232	20.5512	0	0	1.51515	7.07056
ChB7 semilla +Phoma		PROMEDIO	171991	78.3086	27.4321	0.228395	1.74074	1.96913	29.6553	32.9773	27.4073	31.5377	0.666273	3.11131	1.58172	6.77462	10.4532	18.8279	10.9396	19.2742	0.666273	3.11131	0.866618	4.96984
ChB7 semilla +Phoma		E.E	4737.83	0.666584	0.312087	0.0807498	0.280949	0.349944	0.67796	0.429655	0.822856	0.53404	0.261128	1.01374	0.300497	0.73184	0.384634	0.362029	0.412313	0.388862	0.261128	1.01374	0.171255	0.568018
Ca10A+Phoma	4	1	206481	81.2221	34.2963	1.25926	0.703703	1.96296	26.9058	31.2456	25.1121	30.0741	0.896861	5.43421	0.896861	5.43421	8.71236	17.1676	8.96861	17.4262	0.896861	5.43421	0.44843	3.83968
Ca10A+Phoma	4	2	180555	80.9258	31.5	1.74074	0.851851	2.59259	31.2821	34.0077	28.7179	32.4044	1.53846	7.12502	1.02564	5.81253	10.989	19.3596	11.7949	20.0864	1.53846	7.12502	0.512821	4.10655
Ca10A+Phoma	4	3	141667	92.5369	30.5	0.185185	0	0.185185	35.9477	36.8387	35.2941	36.4477	0.653595	4.63715	0	0	12.2316	20.4712	15.4684	23.1599	0.653595	4.63715	0	0
Ca10A+Phoma	4	4	132407	84.895	32.0987	0.481481	0.888888	1.37037	47.5524	43.5971	42.6573	40.7777	1.3986	6.79184	3.4965	10.7771	17.3826	24.6406	17.0163	24.3625	1.3986	6.79184	2.44755	9.0007
Ca10A+Phoma		PROMEDIO	165278	84.895	32.0987	0.916666	0.611111	1.52778	35.422	36.4223	32.9454	34.926	1.12188	5.99705	1.35475	5.50597	12.3289	20.4097	13.3121	21.2587	1.12188	5.99705	0.852201	4.23673
Ca10A+Phoma		E.E	8623	1.35126	0.401655	0.178005	0.103797	0.256196	2.22246	1.32507	1.93148	1.17666	0.104087	0.291194	0.374734	1.10114	0.917698	0.784196	0.907593	0.781438	0.104087	0.291194	0.271938	0.922179
ChB7+Ca10A+Phoma	5	1	165741	80.7314	35.9722	1.53704	2.69444	4.23148	35.1955	36.3886	30.7263	33.6634	1.67598	7.43836	2.7933	9.62108	13.8867	21.879	13.4078	21.4794	1.67598	7.43836	1.67598	7.43836
ChB7+Ca10A+Phoma	5	2	164815	75.5925	28.6111	0.956789	1.80555	2.76234	34.8315	36.1699	30.8989	33.7705	0	0	3.93258	11.438	13.8042	21.8106	13.6704	21.6993	0	0	1.96629	8.06084
ChB7+Ca10A+Phoma	5	3	192592	77.9444	25.7963	0.851851	2.31481	3.16666	25.9615	30.6322	23.0769	28.7105	0.961538	5.62736	1.92308	7.97118	9.89011	18.3298	10.0962	18.5266	0.961538	5.62736	0.961538	5.62736
ChB7+Ca10A+Phoma	5	4	168518	75.9259	22.4444	0.481481	0.407407	0.888888	33.5165	35.3756	32.4176	34.7059	0.549451	4.25094	0.549451	4.25094	10.989	19.3596	13.0037	21.1374	0.549451	4.25094	0.274725	3.00449
ChB7+Ca10A+Phoma		PROMEDIO	172916	77.5485	28.206	0.956789	1.80555	2.76234	32.3763	34.6416	29.2799	32.7126	0.796742	4.32917	2.2996	8.3203	12.1425	20.3448	12.5445	20.7107	0.796742	4.32917	1.21963	6.03276
ChB7+Ca10A+Phoma		E.E	3302.84	0.590664	1.43962	0.109318	0.250178	0.348558	1.08421	0.677033	1.05114	0.677205	0.176551	0.791889	0.35693	0.765039	0.504296	0.445659	0.413779	0.368576	0.176551	0.791889	0.189584	0.566855
Ca10A+ChB7+follaje60d	6	1	165741	77.8888	25.6111	1.46296	0.796296	2.25926	35.1955	36.3886	32.4022	34.6965	1.67598	7.43836	1.11732	6.06769	12.0511	20.3129	12.6629	20.8456	1.67598	7.43836	0.558659	4.28649
Ca10A+ChB7+follaje60d	6	2	193518	78.8888	28.9815	1.92592	0.858024	1.34568	23.9234	29.2825	18.6603	25.593	1.43541	6.88105	3.82775	11.2825	10.5263	18.9318	8.29346	16.7373	1.43541	6.88105	2.39234	8.89778
Ca10A+ChB7+follaje60d	6	3	182407	81.3333	26.1852	0	1.09259	1.09259	27.4112	31.5711	25.3807	30.2512	0	0	2.03046	8.19219	9.64467	18.0929	9.47547	17.928	0	0	1.77665	7.65981
Ca10A+ChB7+follaje60d	6	4	185185	74.6666	24.1111	0	0.685184	0.685184	16	23.5782	15.5	23.1849	0	0	0.5	4.05481	5.07143	13.0145	5.66667	13.7713	0	0	0.25	2.86598
		PROMEDIO	181713	78.1944	26.2222	0.847221	0.858024	1.34568	25.6325	30.2051	22.9858	28.4314	0.777846	3.57985	1.86888	7.39929	9.32337	17.588	9.02463	17.3206	0.777846	3.57985	1.24441	5.92751
		E.E	2911.98	0.690311	0.509189	0.249094	0.0429888	0.166766	1.99124	1.3297	1.87723	1.27594	0.225883	1.03498	0.362341	0.772801	0.750968	0.795853	0.725303	0.732176	0.225883	1.03498	0.252493	0.705473

## Sheet: LA2017
Tratamiento	Tratamiento	Repetición	Pl/ha	t/ha raíz Limpia-Sana	t/ha Total Follaje	t/ha WSD 3,2	t/ha WSD 4,2 + 5	WSD t/ha	Incidencia %)	Incidencia trans	Incidencia 2+3,1+4,1 (%)	Incidencia 2+3,1+4,1 trans	Incidencia 3,2	Incidencia 3,2 trans	Incidencia 4,2+5 (%)	Incidencia 4,2+5 trans	Severidad %)	Severidad trans	Severidad 2+3,1+4,1 (%)	Severidad 2+3,1+4,1 trans	Severidad 3,2	Severidad 3,2 trans	Severidad 4,2+5 (%)	Severidad 4,2+5 trans
Testigo sano	1	1	217592	99.7036	14.4444	1.35185	3.88889	5.24074	32.766	34.9188	27.6596	31.7304	1.2766	6.48751	3.82979	11.2855	12.7052	20.8819	10.7801	19.1675	1.2766	6.48751	2.34043	8.79992
Testigo sano	1	2	208333	99.2221	14.2963	1.85185	4.23456	5.79012	28	31.9481	25.3333	30.22	1.77778	7.66226	0.888889	5.40993	10.3492	18.7659	11.2593	19.6059	1.77778	7.66226	0.444444	3.82255
Testigo sano	1	3	226852	96.3332	12.4815	2.07407	3.16666	5.24074	23.6735	29.1143	19.5918	26.2716	1.63265	7.34106	2.44898	9.00335	9.27114	17.7272	7.89116	16.3146	1.63265	7.34106	1.42857	6.86457
Testigo sano	1	4	217592	95.7406	10.7778	1.24074	5.64814	6.88888	24.6809	29.7884	17.8723	25.0088	0.851064	5.29324	5.95745	14.1274	11.3678	19.704	7.51773	15.9134	0.851064	5.29324	2.97872	9.93843
Testigo sano		PROMEDIO	217592	97.7499	13	1.62963	4.23456	5.79012	27.2801	31.4424	22.6143	28.3077	1.38452	6.69601	3.28128	9.95655	10.9233	19.2698	9.36207	17.7504	1.38452	6.69601	1.79804	7.35637
Testigo sano		E.E	1890.04	0.500592	0.432385	0.09951	0.260533	0.194236	1.02446	0.653468	1.15893	0.795835	0.103324	0.264613	0.537723	0.921305	0.366056	0.336061	0.482516	0.476245	0.103324	0.264613	0.276018	0.668964
Testigo phoma	2	1	221296	101.815	14.7407	3.92592	2.86419	4.74074	35.9833	36.8599	32.636	34.8395	2.09205	8.31639	1.25523	6.43276	13.5684	21.6141	15.2022	22.9483	2.09205	8.31639	0.627615	4.54386
Testigo phoma	2	2	209259	94.9258	14.8148	0.444444	3.51851	3.96296	24.3363	29.5589	20.7965	27.1313	0.442478	3.81407	3.09735	10.1364	9.79772	18.2409	8.99705	17.4546	0.442478	3.81407	1.54867	7.14875
Testigo phoma	2	3	200000	93.3518	12.037	0.222222	3.09259	3.31481	29.6296	32.979	25.9259	30.6089	0.462963	3.9015	3.24074	10.371	12.037	20.3005	12.037	20.3005	0.462963	3.9015	1.62037	7.31324
Testigo phoma	2	4	221296	100.148	13.3889	1.01852	1.98148	3	32.2176	34.5834	28.8703	32.5008	1.25523	6.43276	2.09205	8.31639	11.835	20.122	11.855	20.1397	1.25523	6.43276	1.25523	6.43276
Testigo phoma		PROMEDIO	212963	97.5601	13.7454	1.40278	2.86419	3.75463	30.5417	33.4953	27.0572	31.2701	1.06318	5.61618	2.42134	8.81413	11.8096	20.0694	12.0228	20.2108	1.06318	5.61618	1.26297	6.35965
Testigo phoma		E.E	2584.59	1.01498	0.328505	0.428807	0.161985	0.192501	1.22269	0.767386	1.24906	0.814218	0.195842	0.542863	0.232587	0.458505	0.387124	0.347182	0.633974	0.56094	0.195842	0.542863	0.113017	0.317361
ChB7 semilla +Phoma	3	1	216666	92.5369	14.5185	2.42592	5.25925	7.68518	30.3419	33.4243	24.7863	29.8584	1.7094	7.51259	3.84615	11.3099	12.7595	20.9286	11.2536	19.6007	1.7094	7.51259	2.13675	8.4054
ChB7 semilla +Phoma	3	2	212037	93.7777	13.7592	2.61111	3	5.61111	24.0175	29.3456	19.214	25.9979	1.74672	7.59464	3.05677	10.0691	10.2932	18.7131	9.17031	17.6274	1.74672	7.59464	1.52838	7.10152
ChB7 semilla +Phoma	3	3	221296	90.2221	11.4074	2.37037	5.68518	8.05555	27.6151	31.7019	22.1757	28.0935	1.25523	6.43276	4.1841	11.8032	12.1937	20.438	10.5997	19.0002	1.25523	6.43276	2.30126	8.72539
ChB7 semilla +Phoma	3	4	213889	98.0925	12.9815	1.68518	5.4074	7.09259	38.0952	38.1129	32.4675	34.7365	1.7316	7.5615	3.8961	11.3841	15.2134	22.9572	14.43	22.3255	1.7316	7.5615	2.1645	8.46021
ChB7 semilla +Phoma		PROMEDIO	215972	93.6573	13.1667	2.27315	4.83796	7.1111	30.0174	33.1462	24.6609	29.6716	1.61074	7.27537	3.74578	11.1416	12.6149	20.7592	11.3634	19.6385	1.61074	7.27537	2.03272	8.17313
ChB7 semilla +Phoma		E.E	1006.79	0.825896	0.332539	0.101315	0.30949	0.268944	1.49393	0.92732	1.42013	0.931787	0.0593754	0.140689	0.120721	0.186808	0.507046	0.43659	0.555448	0.493154	0.0593754	0.140689	0.0859572	0.181986
Ca10A+Phoma	4	1	207407	95.3764	14.6728	1.38889	3.67901	5.0679	22.3214	28.1938	16.9643	24.3228	1.78571	7.67944	3.57143	10.8934	10.1403	18.5685	7.7381	16.1513	1.78571	7.67944	2.67857	9.4196
Ca10A+Phoma	4	2	217592	90.5184	17.5185	1.57407	2.44444	4.01851	24.2553	29.5048	20.4255	26.8686	1.2766	6.48751	2.55319	9.19454	9.54407	17.9951	8.65248	17.1066	1.2766	6.48751	1.2766	6.48751
Ca10A+Phoma	4	3	229629	98.0184	12.7407	0	4.55555	4.55555	25	30	20.5645	26.9673	0	0	4.43548	12.1579	10.6567	19.0532	8.87097	17.328	0	0	2.41935	8.94828
Ca10A+Phoma	4	4	213889	97.5925	13.7592	2.59259	4.03703	6.62962	29.8701	33.1297	23.8095	29.2059	2.5974	9.2745	3.4632	10.7251	13.0489	21.1759	11.8326	20.1199	2.5974	9.2745	1.7316	7.5615
Ca10A+Phoma		PROMEDIO	217129	95.3764	14.6728	1.38889	3.67901	5.0679	25.3617	30.2071	20.441	26.8412	1.41493	5.86036	3.50583	10.7427	10.8475	19.1982	9.27354	17.6765	1.41493	5.86036	2.02653	8.10422
Ca10A+Phoma		E.E	2334.02	0.859884	0.513677	0.266622	0.224567	0.281465	0.802653	0.523029	0.698957	0.498975	0.272216	1.01758	0.192457	0.303538	0.384096	0.3469	0.443805	0.426777	0.272216	1.01758	0.160003	0.333884
ChB7+Ca10A+Phoma	5	1	194444	99.2962	16.5555	1.24074	3.81481	5.05555	34.2857	35.8412	29.0476	32.6128	0.952381	5.60041	4.28571	11.9478	13.7415	21.7585	12.381	20.6015	0.952381	5.60041	2.38095	8.8764
ChB7+Ca10A+Phoma	5	2	199074	96.2592	14.1667	0.388889	5	5.38888	32.5581	34.7919	26.5116	30.9904	0.465116	3.91058	5.5814	13.6653	14.1528	22.0986	12.4031	20.6207	0.465116	3.91058	2.7907	9.61657
ChB7+Ca10A+Phoma	5	3	236111	95.3518	13.7592	2.31481	6.12962	8.44444	24.7059	29.805	17.2549	24.5439	1.96078	8.04947	5.4902	13.5511	11.7087	20.0097	7.97386	16.4023	1.96078	8.04947	2.7451	9.53694
ChB7+Ca10A+Phoma	5	4	225000	98.2777	11.1111	0.888888	4.79629	5.68518	25.5144	30.3392	22.2222	28.1255	0.411523	3.67805	2.88066	9.77183	9.81775	18.2602	9.0535	17.5111	0.411523	3.67805	1.64609	7.37137
ChB7+Ca10A+Phoma		PROMEDIO	213657	97.2962	13.8981	1.20833	4.93518	6.14351	29.266	32.6943	23.7591	29.0681	0.947451	5.30963	4.55949	12.234	12.3552	20.5318	10.4529	18.7839	0.947451	5.30963	2.39071	8.85032
ChB7+Ca10A+Phoma		E.E	5030.39	0.4523	0.557538	0.204067	0.237408	0.38884	1.21539	0.766446	1.2927	0.885259	0.179509	0.50437	0.316357	0.454777	0.500206	0.442354	0.570538	0.539474	0.179509	0.50437	0.132298	0.26007
Ca10A+ChB7+follaje60d	8	1	224074	101.102	14.4074	2.61111	4.12	6.73147	35.9504	36.8403	28.0992	32.0113	2.47934	9.05945	5.3719	13.4015	15.2302	22.9706	11.9835	20.2533	2.47934	9.05945	2.89256	9.7922
Ca10A+ChB7+follaje60d	8	2	218518	96.9536	14.4629	3.16666	3.75	6.91666	31.7797	34.3145	25.4237	30.2796	2.54237	9.17487	3.81356	11.2613	13.862	21.8586	12.4294	20.6436	2.54237	9.17487	1.90678	7.93712
Ca10A+ChB7+follaje60d	8	3	217592	93.5925	13.1296	1.01852	3.88889	4.9074	31.9149	34.3976	27.234	31.4573	1.2766	6.48751	3.40426	10.6323	12.7052	20.8819	12.0567	20.3179	1.2766	6.48751	1.70213	7.4965
Ca10A+ChB7+follaje60d	8	4	222222	91.2036	13.3518	2.62963	5.74074	8.37036	34.5833	36.0206	27.0833	31.3602	2.08333	8.29892	5.41667	13.4583	15.6548	23.3072	13.75	21.7656	2.08333	8.29892	2.70833	9.47226
Ca10A+ChB7+follaje60d		PROMEDIO	220602	95.7129	13.8379	2.35648	4.3749	6.73147	33.5571	35.3932	26.9601	31.2771	2.09541	8.25519	4.5016	12.1884	14.363	22.2546	12.5549	20.7451	2.09541	8.25519	2.30245
Ca10A+ChB7+follaje60d		E.E	764.823	1.07443	0.173981	0.232109	0.230814	0.35495	0.513104	0.310999	0.27944	0.181057	0.145615	0.310217	0.261101	0.364152	0.336035	0.276201	0.205077	0.17536	0.145615	0.310217	0.146481

## Sheet: RESUMEN2TEMPORADAS
											RENDIMIENTO
	Tratamientos SELVA NEGRA 2015-16	t/ha raíz Limpia-Sana			t/ha Total Follaje			Raices con pudrición t/ha			t/ha pudricion 4,2 + 5				Tratamientos LOS ANGELES 2015-16	t/ha raíz Limpia-Sana			t/ha Total Follaje			Raices con pudrición t/ha
		prom	E.E	V.E	prom	E.E	V.E	prom	E.E	V.E	prom	E.E	V.E			prom	E.E	V.E	prom	E.E	V.E	prom	E.E	V.E
	Testigo sano	98.6271	3.68045	ab	16.5037	0.630476	b	11.7234	1.07493	abc	7.1111	0.539425	ab		Testigo sano	59.5851	1.79643	ab	10.2741	0.663597	a	3.29629	0.669809	a
	Testigo phoma	93.4073	2.91669	a	13.5407	0.980168	a	18.5037	2.87469	c	13.7037	2.94216	b		Testigo phoma	53.5083	1.72841	a	11.4333	0.77896	ab	5.52222	0.711306	a
	ChB7+Phoma	100.518	0.948302	ab	13.9852	0.522594	ab	11.0518	0.152047	ab	4.05926	0.339234	a		ChB7 +Phoma	61.5555	1.19011	ab	11.9778	0.632618	ab	9.42777	0.864294	b
	Ca10A+Phoma	102.822	2.78904	ab	12.963	0.594502	a	7.64444	0.263354	a	2.72592	0.486939	a		Ca10A+Phoma	62.6333	1.76862	ab	11.5222	0.629283	ab	2.02222	0.222315	a
	ChB7+Ca10A+Phoma	95.9555	0.728189	a	15.5852	0.60038	ab	17.5852	1.22438	bc	8.87407	1.72796	ab		ChB7+Ca10A+Phoma	60.5222	1.83766	ab	10.1667	0.680859	a	4.3	0.612008	a
	ChB7+Ca10A-Phoma	111.911	2.96574	b	14.4197	0.428502	ab	9.70863	1.66355	a	5.43209	1.43995	a		ChB7+Ca10A-Phoma	66.2259	1.32615	b	12.7185	0.47881	b	4.33333	0.501023	a
	Tratamiento SELVA NEGRA 2016-17	t/ha raíz Limpia-Sana			t/ha Total Follaje			Raices con pudrición t/ha							Tratamientos LOS ANGELES 2016-17	t/ha raíz Limpia-Sana			t/ha Total Follaje			Raices con pudrición t/ha
	Testigo sano	75.9999	0.968857	a	25.6852	0.557865	a	2.15278	0.35072	a					Testigo sano	97.7499	0.500592	a	13	0.432385	a	5.79012	0.194236	bc
	Testigo phoma	77.8749	1.18502	a	27.6203	0.458271	a	1.26543	0.109709	a					Testigo phoma	97.5601	1.01498	a	13.7454	0.328505	ab	3.75463	0.192501	a
	ChB7 +Phoma	78.3086	0.666584	a	27.4321	0.312087	a	1.96913	0.349944	a					ChB7 +Phoma	93.6573	0.825896	a	13.1667	0.332539	ab	7.1111	0.268944	c
	Ca10A+Phoma	84.895	1.35126	b	32.0987	0.401655	b	1.52778	0.256196	a					Ca10A+Phoma	95.3764	0.859884	a	14.6728	0.513677	b	5.0679	0.281465	ab
	ChB7+Ca10A+Phoma	77.5485	0.590664	a	28.206	1.43962	a	2.76234	0.348558	a					ChB7+Ca10A+Phoma	97.2962	0.4523	a	13.8981	0.557538	ab	6.14351	0.38884	bc
	ChB7+Ca10A+60dds+Phoma	78.1944	0.690311	a	26.2222	0.509189	a	1.34568	0.166766	a					ChB7+Ca10A+60dds+Phoma	95.7129	1.07443	a	13.8379	0.173981	ab	6.73147	0.35495	bc
